# Supplementary material
Source: bioRxiv or medRxiv preprint supplement (https://www.biorxiv.org/highwire/filestream/50213/field_highwire_adjunct_files/0/168260-1.pdf)
Supplement: Supplementary file [file 168260-1.pdf]

**Supplementary Table 1. Convergent mutations.**

| Nuc. Mut. | AA Mut. | Freq. | Subtype freq. <sup>1</sup> | env part | Observed in other studies                                                                                                 | Identified by Wood et al. |
|-----------|---------|-------|----------------------------|----------|---------------------------------------------------------------------------------------------------------------------------|---------------------------|
| A8216G    | S668G   | 5     | 1                          | gp41     | Confers neutralization sensitivity (O'Rourke et al., 2012).                                                               | N                         |
| G7355A    | E381K   | 5     | 0                          | gp120    | ---                                                                                                                       | Y                         |
| G7632A    | G473E   | 5     | 0                          | gp120    | ---                                                                                                                       | N                         |
| G7653A    | R480K   | 5     | 0                          | gp120    | ---                                                                                                                       | N                         |
| G8198A    | E662K   | 5     | 3                          | gp41     | Facilitates entry into marmoset cells (Pacheco, Basmaciogullari, Labonte, Xiang, & Sodroski, 2008).                       | N                         |
| G8203A    | L664L   | 5     | 162                        | gp41     | ---                                                                                                                       | N                         |
| G8204A    | D664N   | 5     | 2                          | gp41     | Monoclonal antibody escape mutation (Manrique et al., 2007).                                                              | N                         |
| G8329A    | V706V   | 5     | 129                        | gp41     | ---                                                                                                                       | N                         |
| G8542A    | L777L   | 5     | 155                        | gp41     | ---                                                                                                                       | N                         |
| G8551A    | T780T   | 5     | 25                         | gp41     | ---                                                                                                                       | N                         |
| G8585A    | E791K   | 5     | 2                          | gp41     | ---                                                                                                                       | N                         |
| G8108A    | E632K   | 6     | 0                          | gp41     | Mutation abolishes viral entry into cell (He et al., 2008)                                                                | Y                         |
| G8156A    | E648K   | 6     | 10                         | gp41     | Compensatory mutations, once resistant against fusion inhibitors, it increases viral replication rate (Bai et al., 2008). | Y                         |
| G8275A    | M688I   | 6     | 20                         | gp41     | ---                                                                                                                       | N                         |
| G8614A    | L801L   | 6     | 113                        | gp41     | ---                                                                                                                       | N                         |
| A7735G    | Q508Q   | 7     | 49                         | gp41     | ---                                                                                                                       | N                         |
| G7742A    | E510K   | 7     | 162                        | gp41     | Reversion from E to the database consensus K.                                                                             | Y                         |
| G8301A    | R696K   | 9     | 6                          | gp41     | ---                                                                                                                       | Y                         |
| G7658A    | E482K   | 14    | 1                          | gp120    | Most common mutation observed in an <i>in vivo</i> experiment with humanized mice (Ince et al., 2010).                    | Y                         |

<sup>1</sup>Frequency of mutant in subtype consensus out of 170 sequences

Bai, X., Wilson, K. L., Seedorff, J. E., Ahrens, D., Green, J., Davison, D. K., et al. (2008). Impact of the enfuvirtide resistance mutation N43D and the associated baseline polymorphism E137K on peptide sensitivity and six-helix bundle structure. *Biochemistry*, 47(25), 6662–6670. <http://doi.org/10.1021/bi702509d>

- He, Y., Liu, S., Li, J., Lu, H., Qi, Z., Liu, Z., et al. (2008). Conserved salt bridge between the N- and C-terminal heptad repeat regions of the human immunodeficiency virus type 1 gp41 core structure is critical for virus entry and inhibition. *Journal of Virology*, *82*(22), 11129–11139. <http://doi.org/10.1128/JVI.01060-08>
- Ince, W. L., Zhang, L., Jiang, Q., Arrildt, K., Su, L., & Swanstrom, R. (2010). Evolution of the HIV-1 env gene in the Rag2<sup>-/-</sup> gammaC<sup>-/-</sup> humanized mouse model. *Journal of Virology*, *84*(6), 2740–2752. <http://doi.org/10.1128/JVI.02180-09>
- Manrique, A., Rusert, P., Joos, B., Fischer, M., Kuster, H., Leemann, C., et al. (2007). In vivo and in vitro escape from neutralizing antibodies 2G12, 2F5, and 4E10. *Journal of Virology*, *81*(16), 8793–8808. <http://doi.org/10.1128/JVI.00598-07>
- O'Rourke, S. M., Schweighardt, B., Phung, P., Mesa, K. A., Vollrath, A. L., Tatsuno, G. P., et al. (2012). Sequences in glycoprotein gp41, the CD4 binding site, and the V2 domain regulate sensitivity and resistance of HIV-1 to broadly neutralizing antibodies. *Journal of Virology*, *86*(22), 12105–12114. <http://doi.org/10.1128/JVI.01352-12>
- Pacheco, B., Basmaciogullari, S., Labonte, J. A., Xiang, S.-H., & Sodroski, J. (2008). Adaptation of the human immunodeficiency virus type 1 envelope glycoproteins to new world monkey receptors. *Journal of Virology*, *82*(1), 346–357. <http://doi.org/10.1128/JVI.01299-07>
